# Supplementary material for: Regulation of human bone marrow stromal cell proliferation and differentiation capacity by glucocorticoid receptor and AP-1 crosstalk
Source: PubMed Central journal article supplement (PMC3607410; doi:10.1002/jbmr.120), 2010-10

**A**

Physiologic level of PDGF and Glucocorticoid

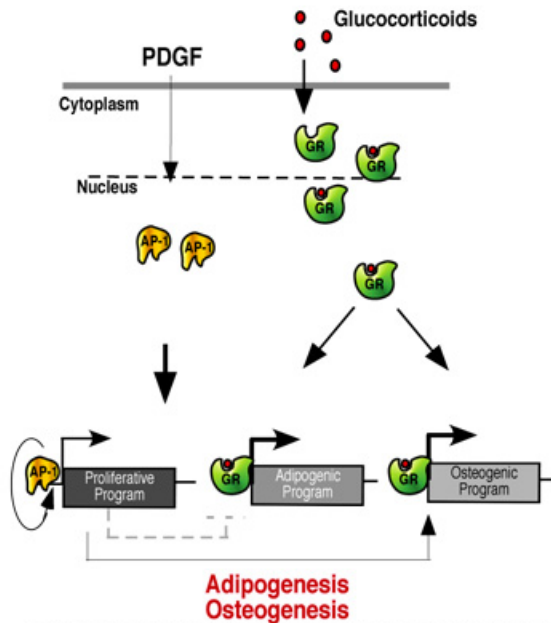

**B**

High level of PDGF, no Glucocorticoid

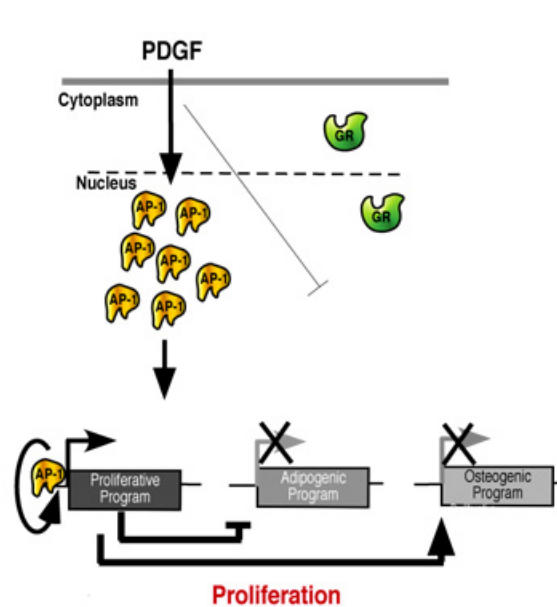

**C**

High level of PDGF, Physiologic level of Glucocorticoid

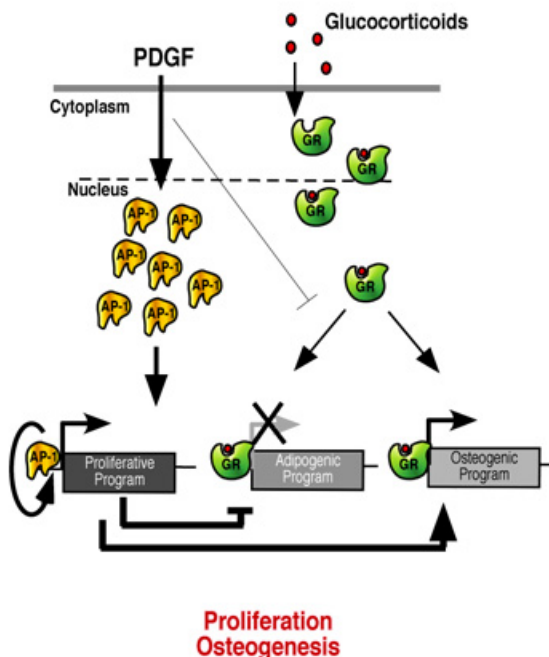

**D**

Physiologic level of PDGF, High level of Glucocorticoid

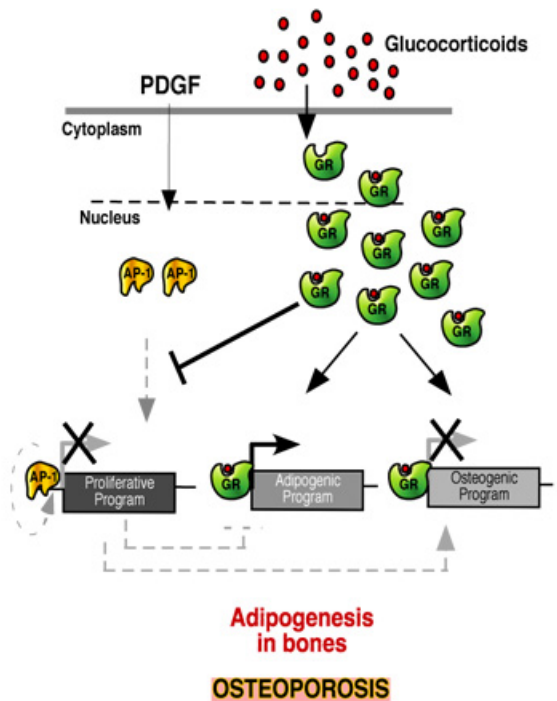

Supplement: jbmr0025-2115-sd8.pdf [file jbmr0025-2115-sd8.pdf]
